# Supplementary material for: Phosphine-free synthesis and optical stabilities of composition-tuneable monodisperse ternary PbSe1−xSx alloyed nanocrystals via cation exchange
Source: Royal Society of Chemistry journal article supplement (doi:10.1039/c7ce02114c), 2018-01-01
Supplement: c7ce02114c1.pdf [file c7ce02114c1.pdf]

Supporting Information for

**Phosphine-Free Synthesis and Optical Stabilities of Compositionally Tuneable  
Monodispersed Ternary  $\text{PbSe}_{1-x}\text{S}_x$  Alloyed Nanocrystals *via* Cation Exchange**

Chi Zhang,<sup>a</sup> Xiaoming Fu,<sup>ac</sup> Zhiwei Peng,<sup>b</sup> Junhui Gao,<sup>ad</sup> Yong Xia,<sup>ad</sup> Jianbing Zhang,<sup>ad</sup> Wei Luo,<sup>ad</sup> Honglang Li,<sup>\*e</sup> YuHuang Wang,<sup>\*b</sup> and Daoli Zhang<sup>\*abd</sup>

**Contents**

Fig S1. XRF results and corresponding element composition of (a)  $\text{CdSe}_{0.3}\text{S}_{0.7}$ , (b)  $\text{CdSe}_{0.5}\text{S}_{0.5}$  and (c)  $\text{CdSe}_{0.7}\text{S}_{0.3}$  alloyed NC samples. (d) Experimental and theoretical S content of  $\text{CdSe}_{1-x}\text{S}_x$  alloyed NCs ..... 2

Fig S2. Temporal evolution of the absorption spectra of  $\text{CdSe}_{0.3}\text{S}_{0.7}$ ,  $\text{CdSe}_{0.5}\text{S}_{0.5}$  and  $\text{CdSe}_{0.7}\text{S}_{0.3}$  alloyed NCs stored in air for 0, 7, 15, 20 and 30 days respectively ..... 3

---

<sup>a</sup> School of Optical and Electronic Information, Huazhong University of Science and Technology, 1037 Luoyu Road, Hongshan District, Wuhan City, Hubei Province, 430074, P. R. China. E-mail: [zhang\\_daoli@hust.edu.cn](mailto:zhang_daoli@hust.edu.cn)

<sup>b</sup> Department of Chemistry and Biochemistry, University of Maryland, 8051 Regent Drive, College Park, MD 20742, USA. E-mail: [yhw@umd.edu](mailto:yhw@umd.edu)

<sup>c</sup> School of Physics, Communication and Electronics, Jiangxi Normal University, 99 Ziyang Avenues, Nanchang City, Jiangxi Province, 330022, P. R. China.

<sup>d</sup> Engineering Research Center for Functional Ceramics, the Ministry of Education, Huazhong University of Science and Technology, 1037 Luoyu Road, Hongshan District, Wuhan Hubei 430074, P. R. China.

<sup>e</sup> Institute of Acoustics, Chinese Academy of Sciences, 21 North 4<sup>th</sup> Ring Road, Haidian District, Beijing, 100190, P. R. China. E-mail: [hl@mail.ioa.ac.cn](mailto:hl@mail.ioa.ac.cn)

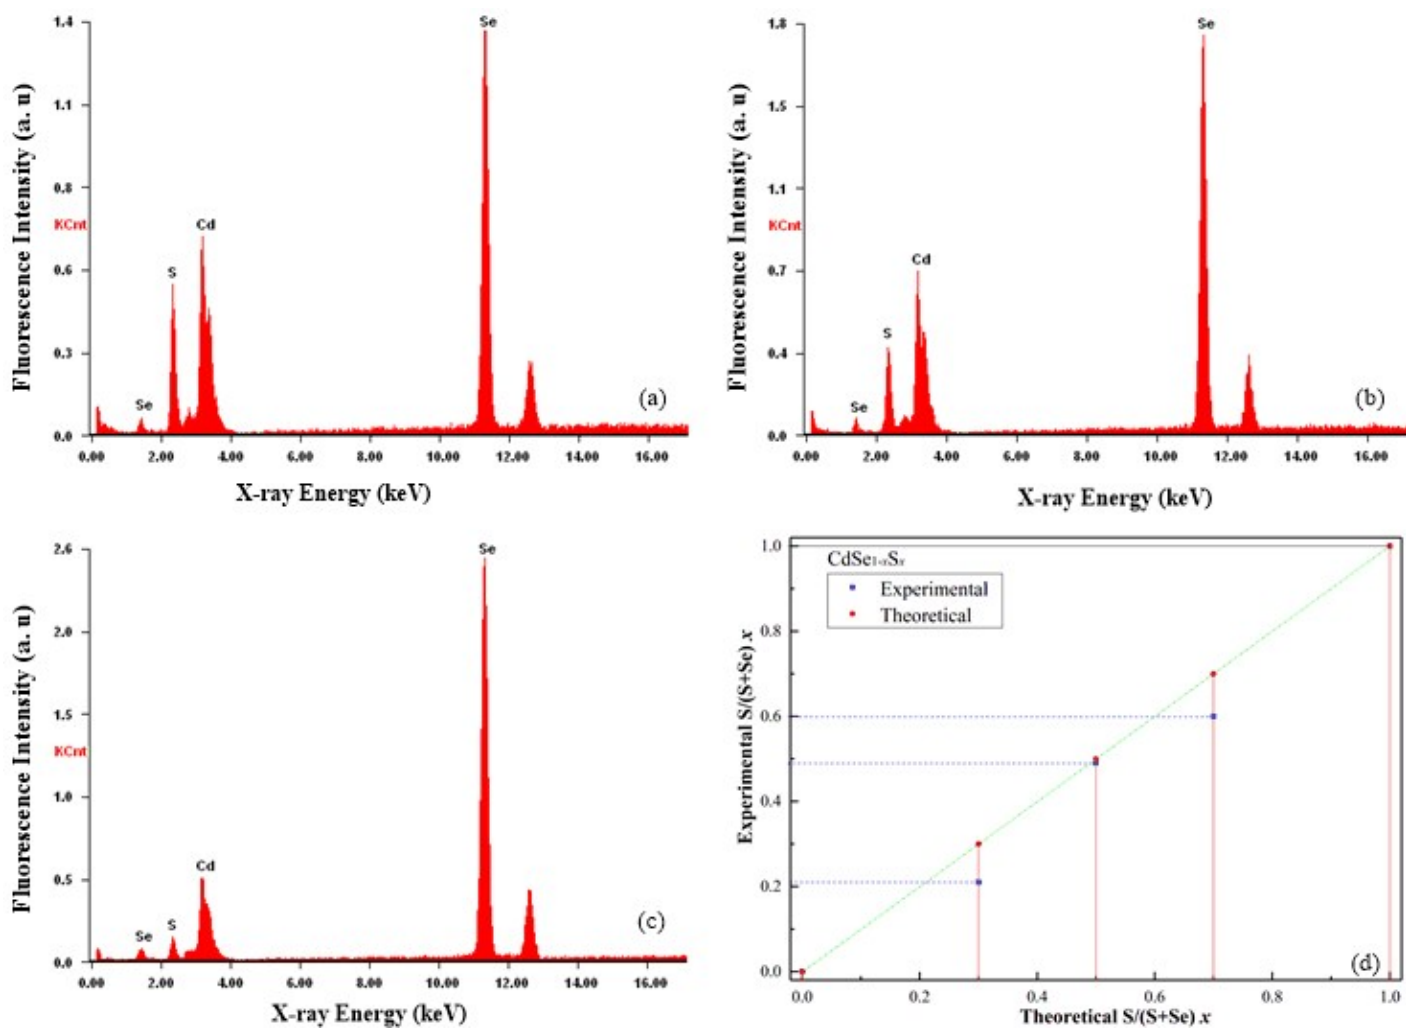

**Figure S1** XRF results and corresponding element composition of (a) CdSe<sub>0.3</sub>S<sub>0.7</sub>, (b) CdSe<sub>0.5</sub>S<sub>0.5</sub> and (c) CdSe<sub>0.7</sub>S<sub>0.3</sub> alloyed NC samples. (d) Experimental and theoretical S content of CdSe<sub>1-x</sub>S<sub>x</sub> alloyed NCs.

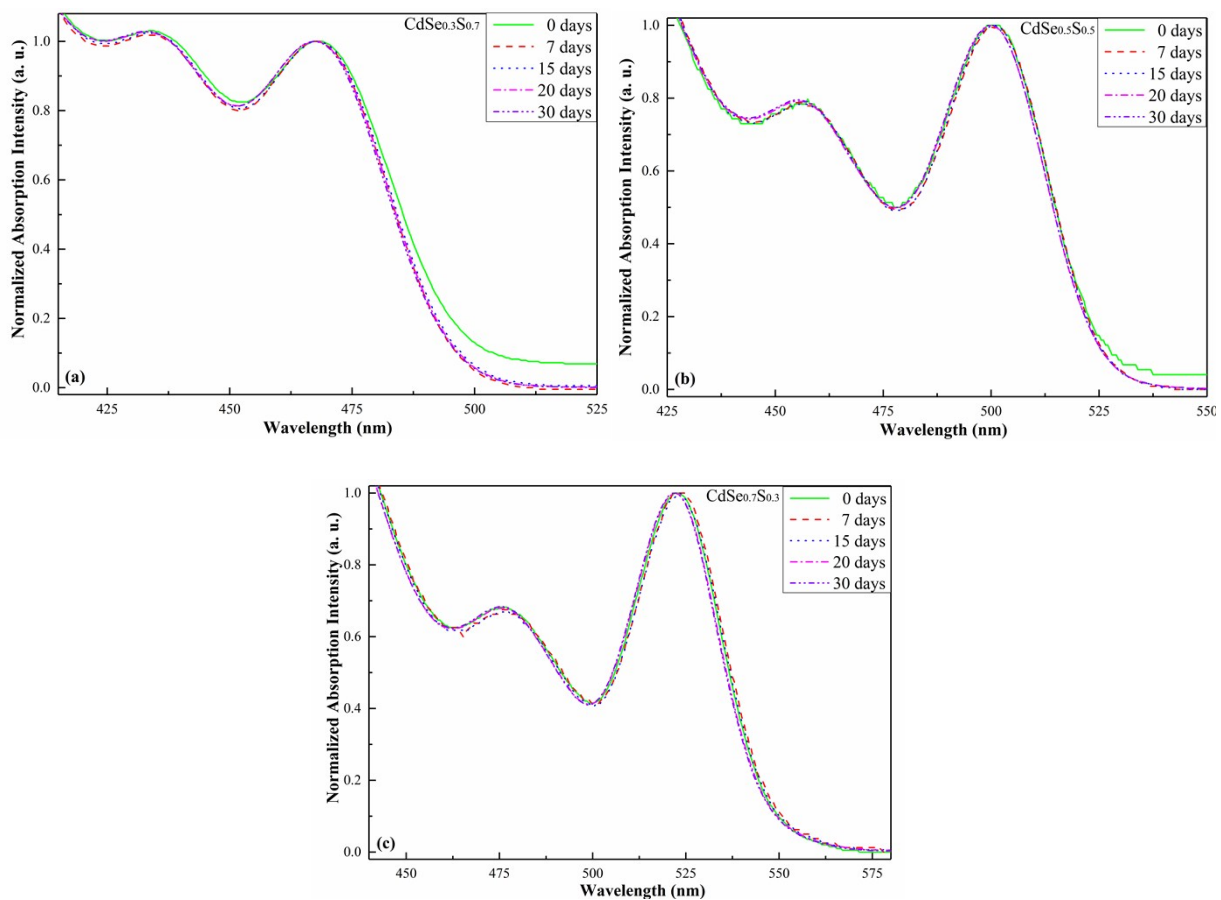

**Figure S2** Temporal evolution of the absorption spectra of CdSe<sub>0.3</sub>S<sub>0.7</sub>, CdSe<sub>0.5</sub>S<sub>0.5</sub> and CdSe<sub>0.7</sub>S<sub>0.3</sub> alloyed NCs stored in air for 0, 7, 15, 20 and 30 days respectively.
